# Supplementary material for: Large Dosage of Chishao in Formulae for Cholestatic Hepatitis: A Systematic Review and Meta‐Analysis
Source: Hindawi journal article supplement (doi:10.1155/2014/328152), 2014-01-01
Supplement: f1 [file 328152.f1.pdf]

Affiliated Table: Supplementary information of all herbs for corresponding formulae

| Study ID  | Chishao Formulae               | Dosage of Chishao          | Other Chinese Herbal Medicine                                                                                                                                           |
|-----------|--------------------------------|----------------------------|-------------------------------------------------------------------------------------------------------------------------------------------------------------------------|
| Tang 2013 | Yin Chen Xiao Dan decoction    | 30 g                       | Yinchen, Jinqiancao, Danshen, Zexie, Zhuling, Fuling, Dahuang, Chaihu                                                                                                   |
| Chen 2013 | Yin Chen Hao decoction jia wei | 60 g                       | Yinchen, Zhizi, Dahuang                                                                                                                                                 |
| Wu 2012   | Huo Xue Qing Dan decoction     | 30 g                       | Dahuang, Danshen, Yinchen, Mudanpi, Danggui, Zexie, Shengdihuang, Chenpi, Gancao                                                                                        |
| Xu 2011   | Chishao relevant formulae      | 100 g                      | Huangqi, Taoren, Honghua, Danshen, Sanleng, Ezhu                                                                                                                        |
| Zhu 2010  | Chishao relevant formulae      | 30-80 g                    | Yinchen, Danshen, Huzhang, Sanqi, Yujin, Jinqiancao, Shanzha                                                                                                            |
| He 2008   | Chishao relevant formulae      | 60 g                       | Huzhang, Yinchen, Tufuling, Maiya, Baishao, Tianjihuang, Jiaogulan, Baihuasheshecao, ChuiPENcao, Ezhu, Baizhu, Gancao                                                   |
| Xie 2008  | Chishao Tui Huang decoction    | 60-100 g                   | Yinchen, Zhizi, Dahuang, Dangshen, Baizhu, Fuling, Danggui, Honghua, Taoren, Jineijing, Jiaomaiya, Jiaoshenqu, Jiaoshanzha                                              |
| Shu 2007  | Wen Li Huo Xue decoction       | 25 g                       | Yinchen, Fuling, Zexie, Danshen, Baizhu, Gegen, Guizhi, Chenqianzi, Baihuasheshecao, Pugongying, Yujin, Ganjiang                                                        |
| Li 2006   | Jian Pi Li Dan decoction       | 25 g                       | Huangqi, Dangshen, Zhizi, Baizhu, Jinqiancao, Yinchen, Dahuang, Chaihu, Baishao, Fuling, Haijinsha, Ezhu, Nvzhenzi, Zhigancao, Gualou, Whitmania pigra Whitman, Tabanus |
| He 2003   | Chi Dan Tui Huang granule      | Original formulae is 150 g | Danshen, Gegen, Gualou                                                                                                                                                  |
| He* 2003  | Chi Dan Tui Huang granule      | Original formulae is 150 g | Danshen, Gegen, Gualou                                                                                                                                                  |
